# Supplementary material for: Integrating transcription-factor abundance with chromatin accessibility in human erythroid lineage commitment
Source: PubMed Central journal article supplement — Cell Rep Methods. Author manuscript; Available in PMC 2022 Apr 21. (PMC9017139; doi:10.1016/j.crmeth.2022.100188), 2022-03-21
Supplement: mmc1.pdf [file mmc1.pdf]

**Cell Reports Methods, Volume 2**

**Supplemental information**

**Integrating transcription-factor**

**abundance with chromatin accessibility in human**

**erythroid lineage commitment**

**Reema Baskar, Amy F. Chen, Patricia Favaro, Warren Reynolds, Fabian Mueller, Luciene Borges, Sizun Jiang, Hyun Shin Park, Eric T. Kool, William J. Greenleaf, and Sean C. Bendall**

## Supplemental materials

**Table S1. Mass cytometry antibody panel, related to STAR methods**

| <b>Antibody target and metal</b> | <b>Source</b>   | <b>Catalog #</b> | <b>Staining concentration (mg/mL)</b> |
|----------------------------------|-----------------|------------------|---------------------------------------|
| CD45-89Y                         | Fluidigm        | 3089003          | 2                                     |
| CD235-113In                      | Biolegend       | 349102           | 1                                     |
| CD71-115                         | Biolegend       | 334102           | 3                                     |
| CD61-139La                       | Biolegend       | 336402           | 0.5                                   |
| CD3-141Pr                        | BD Biosciences  | 561416           | 1                                     |
| CD19-142Nd                       | Biolegend       | 302202           | 0.25                                  |
| CD90-143Nd                       | BD Biosciences  | 555594           | 5                                     |
| CD14-144Nd                       | Biolegend       | 301802           | 4                                     |
| CD164-145Nd                      | Biolegend       | 324802           | 4                                     |
| CD34-148Nd                       | Biolegend       | 343502           | 1                                     |
| CD105-150Nd                      | Biolegend       | 323202           | 4                                     |
| CD123-151Eu                      | Biolegend       | 306002           | 1                                     |
| CD10-152Sm                       | Biolegend       | 312202           | 1                                     |
| FcER1-153Eu                      | Biolegend       | 334602           | 1                                     |
| CD84-154Sm                       | Biolegend       | 326002           | 1                                     |
| CD33-158Gd                       | Biolegend       | 303402           | 2                                     |
| CD11c-159Tb                      | Biolegend       | 301602           | 1                                     |
| GATA-1-160Gd                     | Cell Signalling | 3535             | 3                                     |
| CD7-162Dy                        | BD Biosciences  | 555359           | 1                                     |
| CD49f-164Dy                      | Biolegend       | 555734           | 3                                     |
| CD127-165Ho                      | Biolegend       | 351302           | 1                                     |
| CD66-167Er                       | BD Biosciences  | 551354           | 1                                     |
| CD38-168Er                       | Biolegend       | 303502           | 2                                     |
| CD45RA-169Tm                     | Biolegend       | 304102           | 1                                     |
| CD135-170Er                      | Biolegend       | 313302           | 1.5                                   |
| CD117-171Yb                      | Biolegend       | 313202           | 2                                     |
| CD-133-172Yb                     | Miltenyi Biotec | 130-108-062      | 8                                     |
| CD172ab-173Yb                    | Biolegend       | 323802           | 3                                     |
| CD2-174Yb                        | Biolegend       | 309202           | 1                                     |
| HLA-DR-209Bi                     | Biolegend       | 307602           | 1                                     |

**Table S2. FACS antibody panel, related to STAR methods**

| <b>Antibody target and fluorochrome</b> | <b>Source</b>            | <b>Catalog #</b> | <b>Clone</b> |
|-----------------------------------------|--------------------------|------------------|--------------|
| CD15-biotinylated                       | Biolegend                | 301914           | HI98         |
| CD3-biotinylated                        | Biolegend                | 300404           | UCHT1        |
| CD7-biotinylated                        | Thermo Fisher Scientific | 13-0079-82       | 124-1D1      |
| CD56-biotinylated                       | Biolegend                | 362536           | 5.1H11       |
| CD34-FITC                               | Mytenyi                  | 130113178        | AC136        |
| CD38-BV421                              | Biolegend                | 303526           | HIT2         |
| CD45RA-AF700                            | Biolegend                | 304120           | HI100        |
| CD10-BV650                              | BD Biosciences           | 563734           | HI10a        |
| CD123-PECy7                             | Biolegend                | 306010           | 6H6          |
| GATA-1-PE                               | Cell Signalling          | 13353S           | D52H6        |
| CD38-APC/Cy7                            | Biolegend                | 303534           | HIT2         |
| CD71-PE                                 | Biolegend                | 334108           | CY1G4        |
| CD33-PE/Cy7                             | Biolegend                | 303434           | WM53         |
| CD84-APC                                | Biolegend                | 326010           | CD84.1.21    |

## Supplemental figures

### Figure S1, related to Figure 1

#### Figure S1. Baskar Chen et. al.

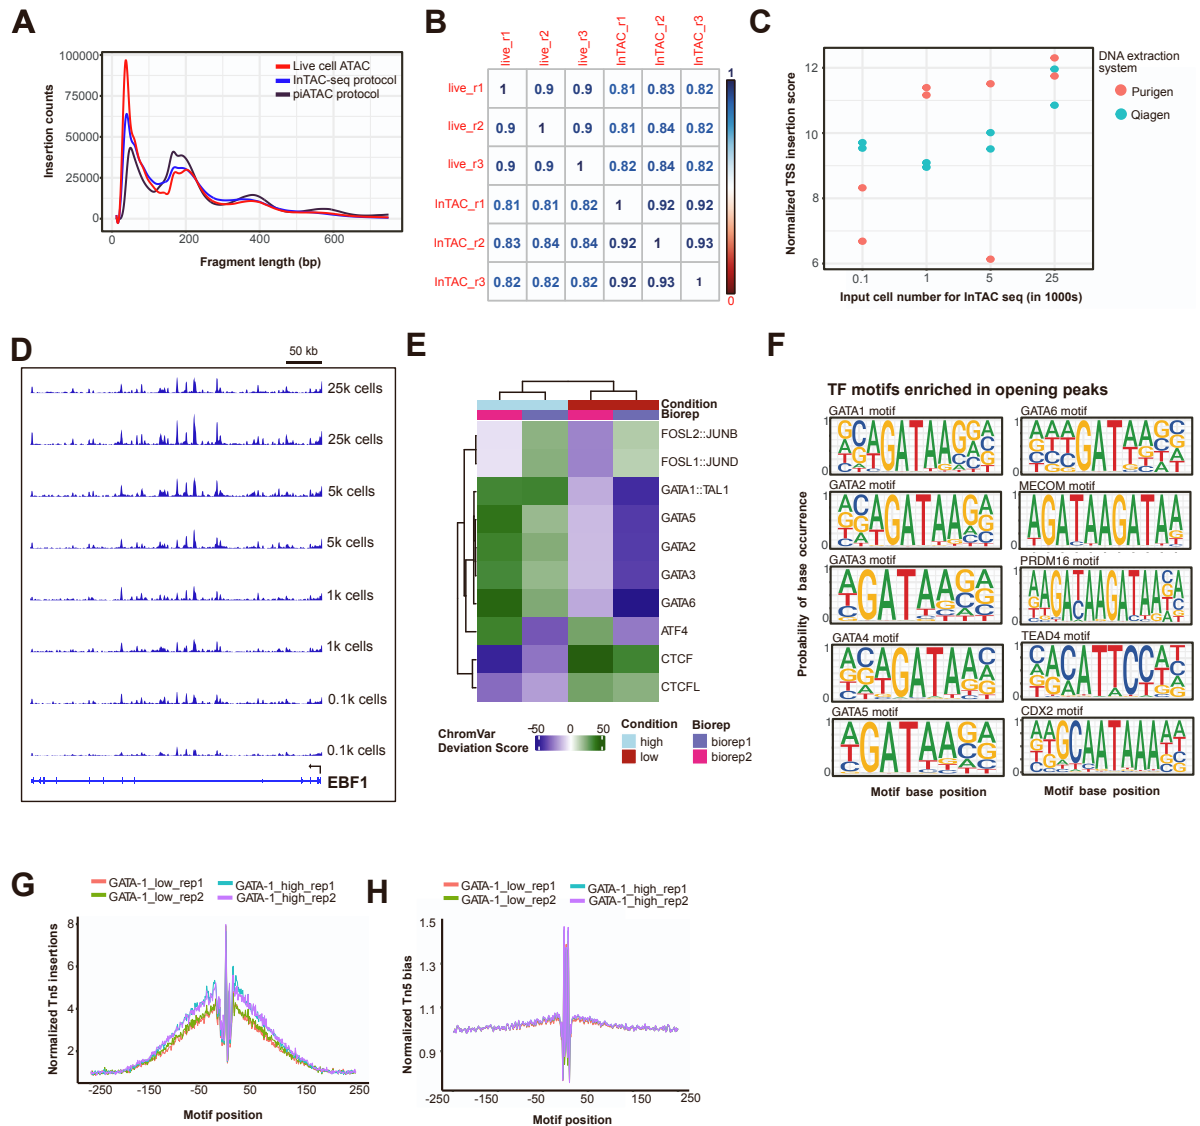

**Figure S1.** InTAC-seq works robustly on low cell numbers (down to 100 cells)

**A.** Fragment length distribution of ATAC-seq libraries generated from live, InTAC-seq and published bulk piATAC samples. **B.** Spearman correlation plot of reads in peaks across live and InTAC-seq samples. **C.** Normalized TSS insertion scores for InTAC-seq samples generated from the indicated input cell numbers across replicates and DNA extraction methods. **D.** Genome coverage at EBF1 locus of InTAC-seq data generated from indicated cell numbers. **E.** Heatmap of chromVAR deviation scores across GATA-1 high and GATA-1 low K562 cells for the top 50 most variable TF motifs. **F.** TF motif sequence logos for most significantly enriched motifs in opening peaks as shown in Fig1H. **G.** Bias-corrected, normalized Tn5 insertions across all GATA-1 motif sites in consensus peaks. **H.** Normalized Tn5 bias across all GATA-1 motif sites in consensus peaks.

Figure S2, related to Figure 2

Figure S2. Baskar Chen et. al.

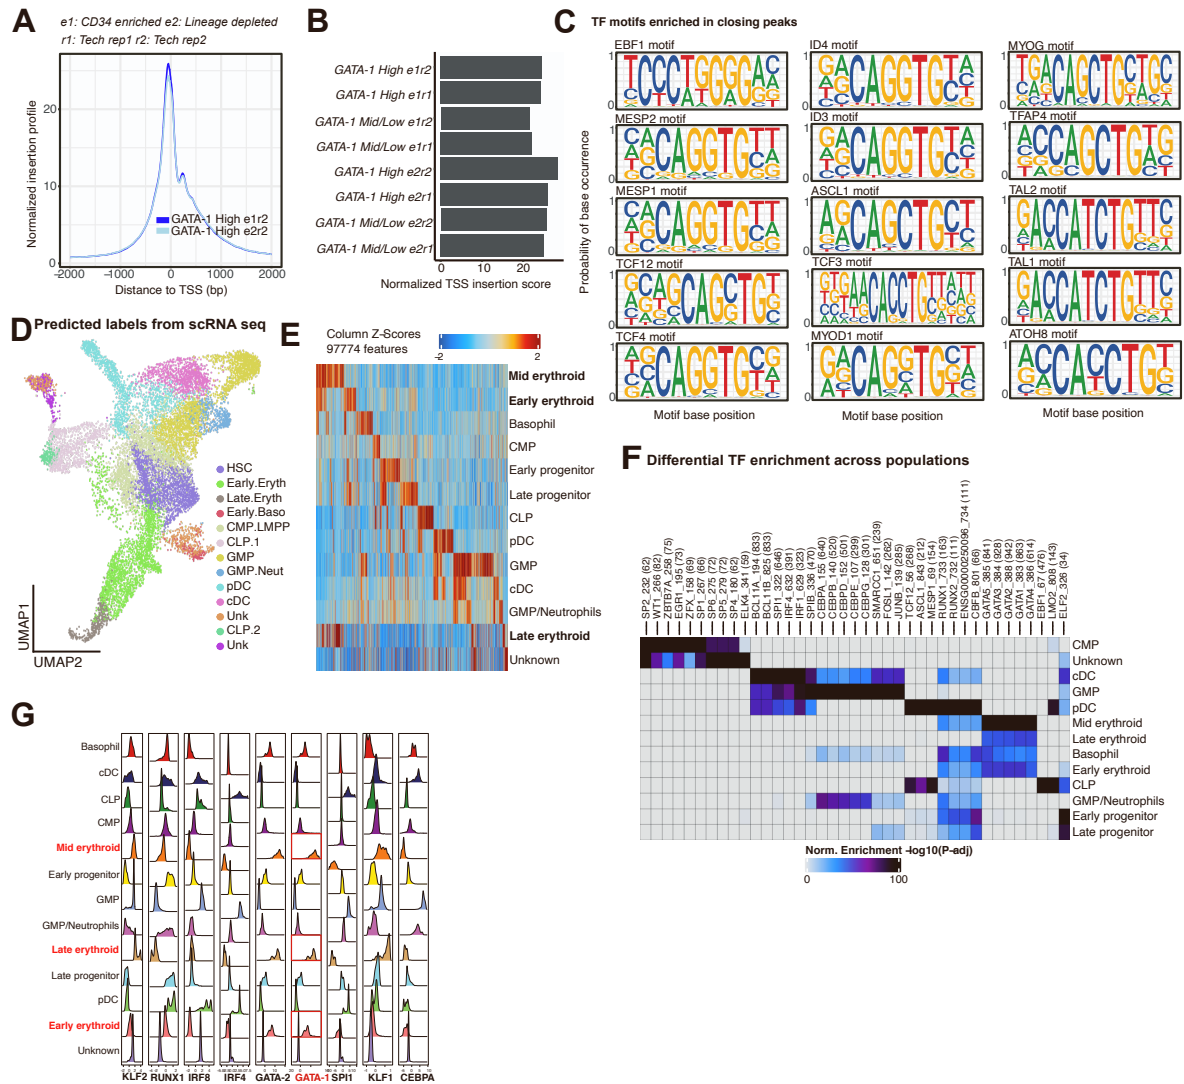

**Figure S2.** InTAC-seq data can be integrated into scATAC to inform annotation of GATA-1 high BM progenitor cells

**A.** TSS insertion profiles for GATA-1 high BM samples. **B.** Normalized TSS scores of technical and biological replicates for GATA-1 High and Mid/Low BM progenitor samples. **C.** TF motif sequence logos for motifs most significantly enriched in peaks that are significantly more accessible in GATA-1 mid/low population as shown in Fig2E. **D.** UMAP of published scATAC data predictively labelled by previously annotated scRNA seq reads using Seurat's TransferAnchors single cell genomics integration method. **E.** Heatmap of variable gene score features across scATAC cluster labels. **F.** Heatmap of differential TF enrichment by wilcox testing across annotated BM populations. **G.** Stacked density plots of chromVAR deviation scores of key TFs across scATAC cluster labels.

Figure S3, related to Figure 3

Figure S3. Baskar Chen et. al.

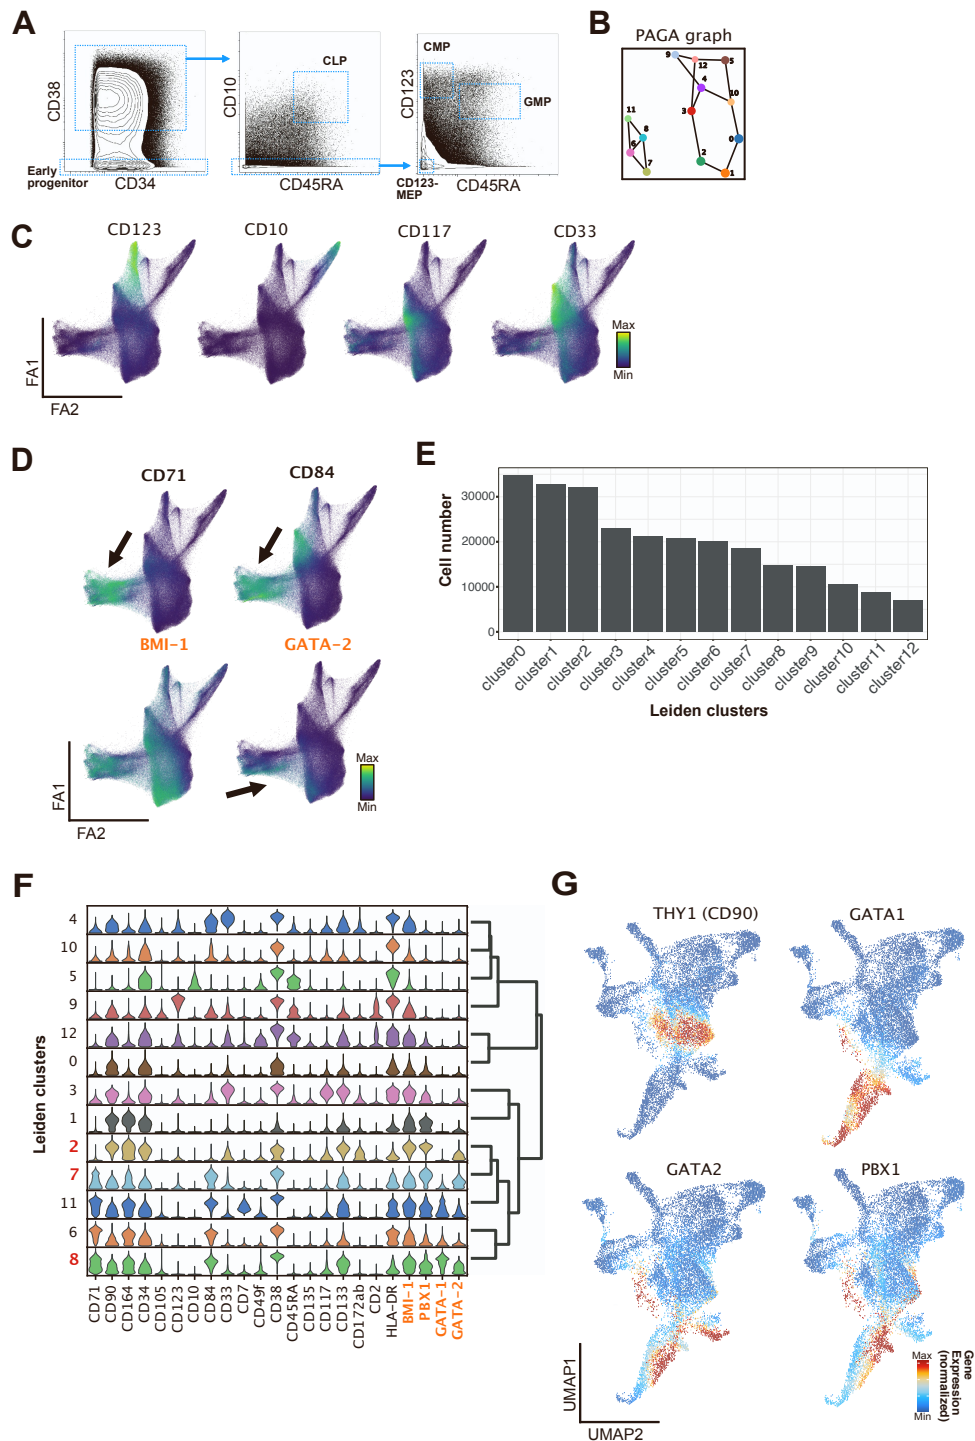

**Figure S3.** Single-cell proteomic profiling of BM progenitor revealed phenotypic states associated with GATA-1 expression

**A.** Mass cytometry gating strategy for early progenitors, CLP, GMP, CMP and CD123- MEP respectively **B.** PAGA graph constructed based on nodes defined by Leiden clustering on density-downsampled dataset **C.** Force-directed layout of

downsampled BM progenitors overlaid with key surface marker abundance **D**. Normalized marker expression of relevant erythropoiesis-related surface markers and TF proteins (in orange) across force-directed layout. **E**. Barplot showing number of cells per cluster across Leiden clusters **F**. Stacked violin plot of surface markers and TF proteins across Leiden clusters **G**. scATAC UMAP visualized with integrated gene expression values for markers demarcating early progenitors such as HSC as well as erythroid-primed progenitors.

Figure S4, related to Figure 4

Figure S4. Baskar Chen et. al.

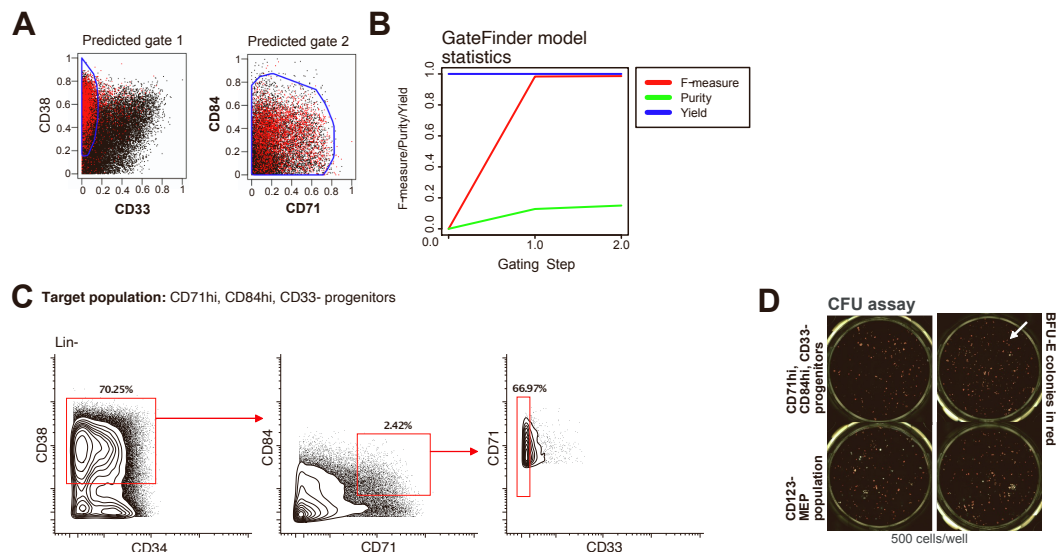

**Figure S4.** GateFinder identified surface marker gating strategy to enrich for GATA-1 high BM progenitors

**A.** Predicted gates from GateFinder identifies CD33, CD71 and CD84 (in bold) as putative surface gating surrogates for GATA-1 high BM progenitor cells. **B.** GateFinder algorithm output of gating steps (2) and F-measure, purity and yield of target GATA-1 high BM progenitor population as enriched from all BM progenitors. **C.** Contour plots of BM progenitors gated with predicted strategy. **D.** BFU colonies (in red) in clonal assay from single cell seeded target population (as defined by CD71hi, CD84hi, CD33-) vs CD123- MEP population.

Figure S5, related to Figure 5

Figure S5. Baskar Chen et. al.

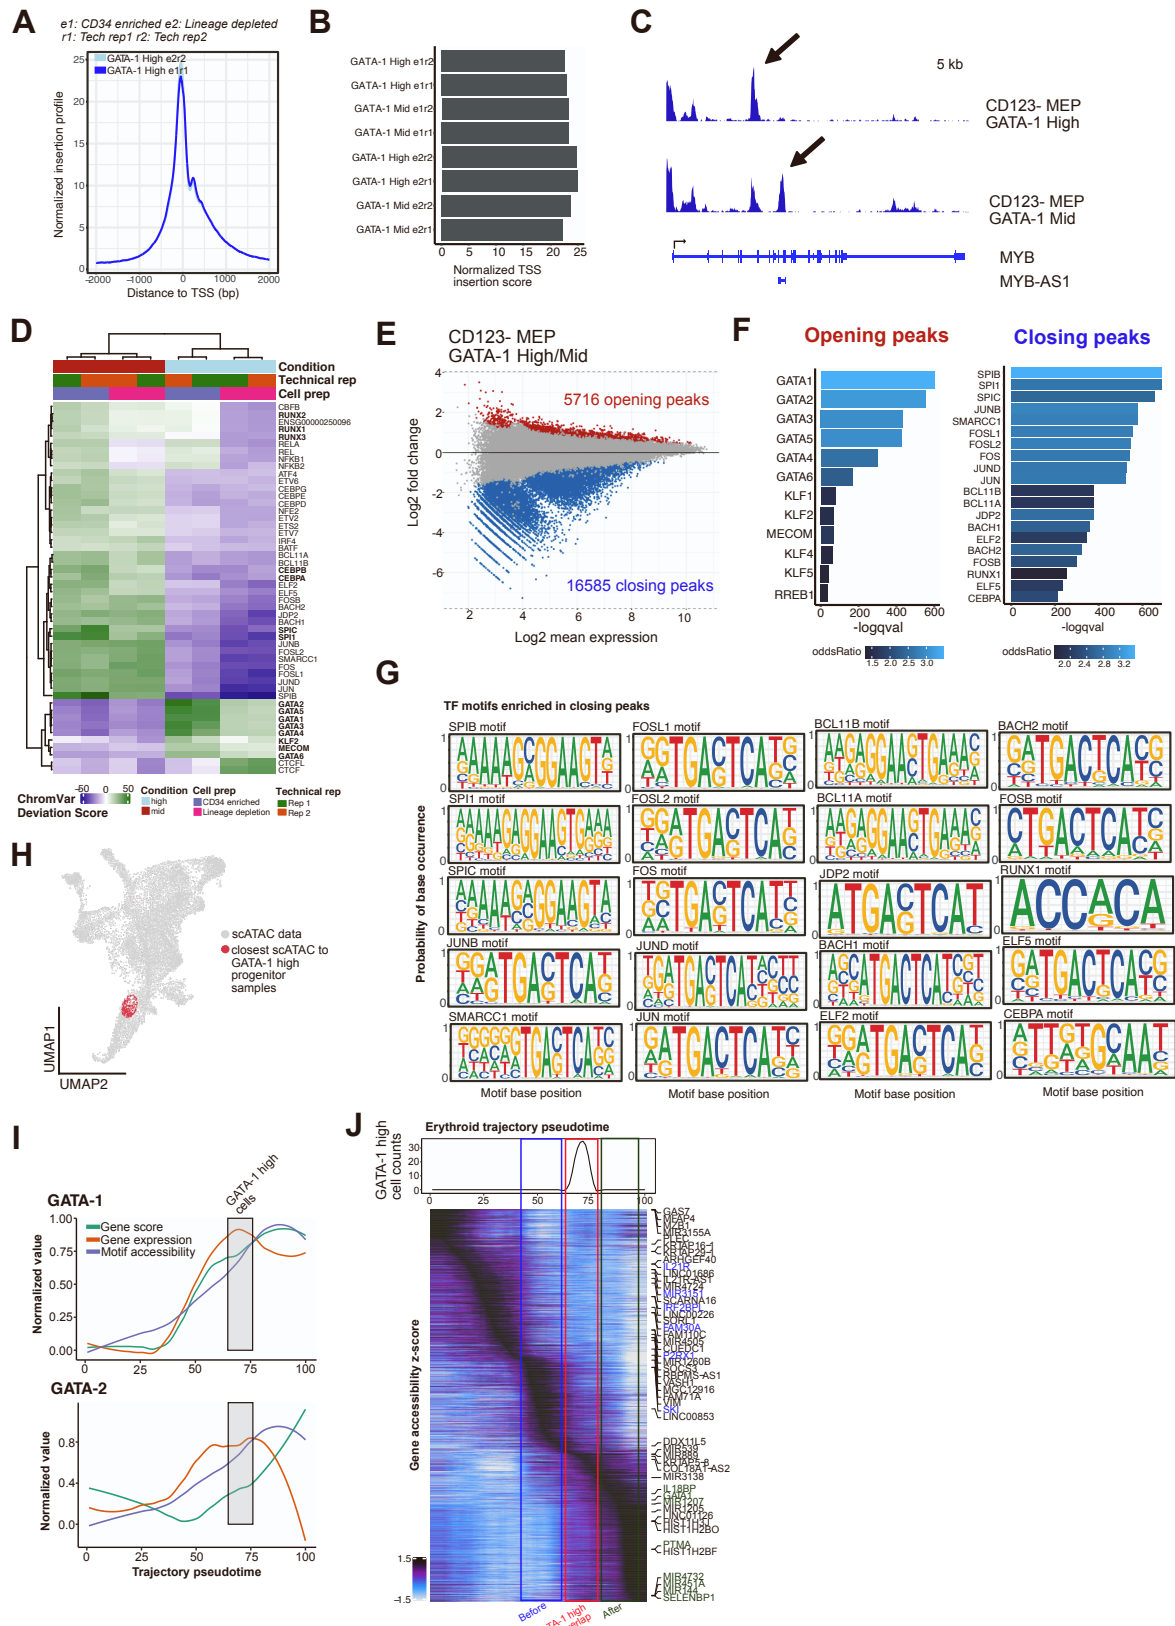



**Figure S5.** High GATA-1 protein abundance inferred through InTAC-seq overlaps epigenetic switch to erythroid commitment

**A.** TSS insertion profiles for GATA-1 high CD123- MEP samples. **B.** Normalized TSS scores of technical and biological replicates for GATA-1 high and GATA-1 mid CD123- MEP samples. **C.** InTAC genome coverage plots at MYB locus comparing GATA-1 high and GATA-1 mid CD123- MEP samples. **D.** Heatmap of chromVAR deviation scores across GATA-1 high and mid CD123- MEP cells for top 50 most variable TFs. **E.** MA plot of log<sub>2</sub> fold change in accessibility between GATA-1 high and GATA-1 mid CD123- MEPs vs log<sub>2</sub> mean number of reads in consensus peaks. Peaks with significant changes in accessibility are highlighted in red or blue. **F.** Most significantly enriched TF motifs in differentially accessible peaks between GATA-1 high and mid CD123- MEP cells calculated using Fisher's test. **G.** TF motif sequence logos of motifs most significantly enriched in peaks that are significantly more accessible in GATA-1 mid population as shown in FigS3F. **H.** Closest 500 scATAC cells to projected bulk GATA-1 high InTAC samples by mahalanobis distance visualized on scATAC UMAP. **I.** Integrated line plot with gene accessibility score (gene score), gene expression score and motif accessibility score (all normalized between 0-1) of GATA-1 and GATA-2 across derived erythroid trajectory with overlaid demarcation of where inferred GATA-1 high scATAC cells are positioned. **J.** Heatmap of top variable gene scores by gene accessibility across constructed erythroid trajectory with overlaid demarcation of before, at and after GATA-1 high point in the trajectory. (Gene colours correspond to the trajectory bins)
